# Supplementary material for: Enabling Eating Detection in a Free-living Environment: Integrative Engineering and Machine Learning Study
Source: PubMed Central journal article supplement (PMC8924783; doi:10.2196/27934), 2022-03-01
Supplement: jmir_v24i3e27934_app2.pdf [file jmir_v24i3e27934_app2.pdf]

**Supplementary materials for:**

*Zhang et al., Enabling Eating Detection in a Free-living Environment*

**Figure S1:** Summary of the sampling information for training and validation cohort. (a) shows the distribution of the sample lengths in hours, and (b, c) shows the distribution of the sample start time and end time.

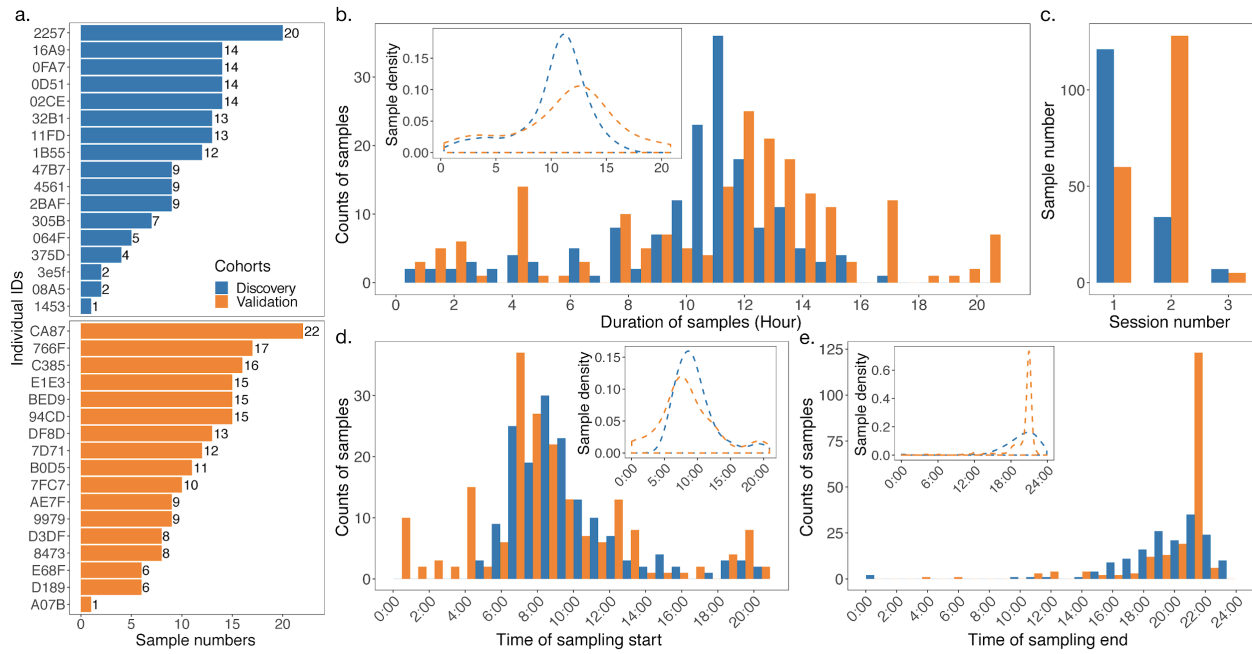

**Figure S2:** Two examples of the problematic datasets, the blue lines denotes the meal time, and the grey lines denotes the common signals. (a) corresponds to the short sampling time problem, where the sampling just starts and ends before and after the meal; (b) shows the weak signal problem. There is a plain line in the signal, which was not recorded as an interruption.

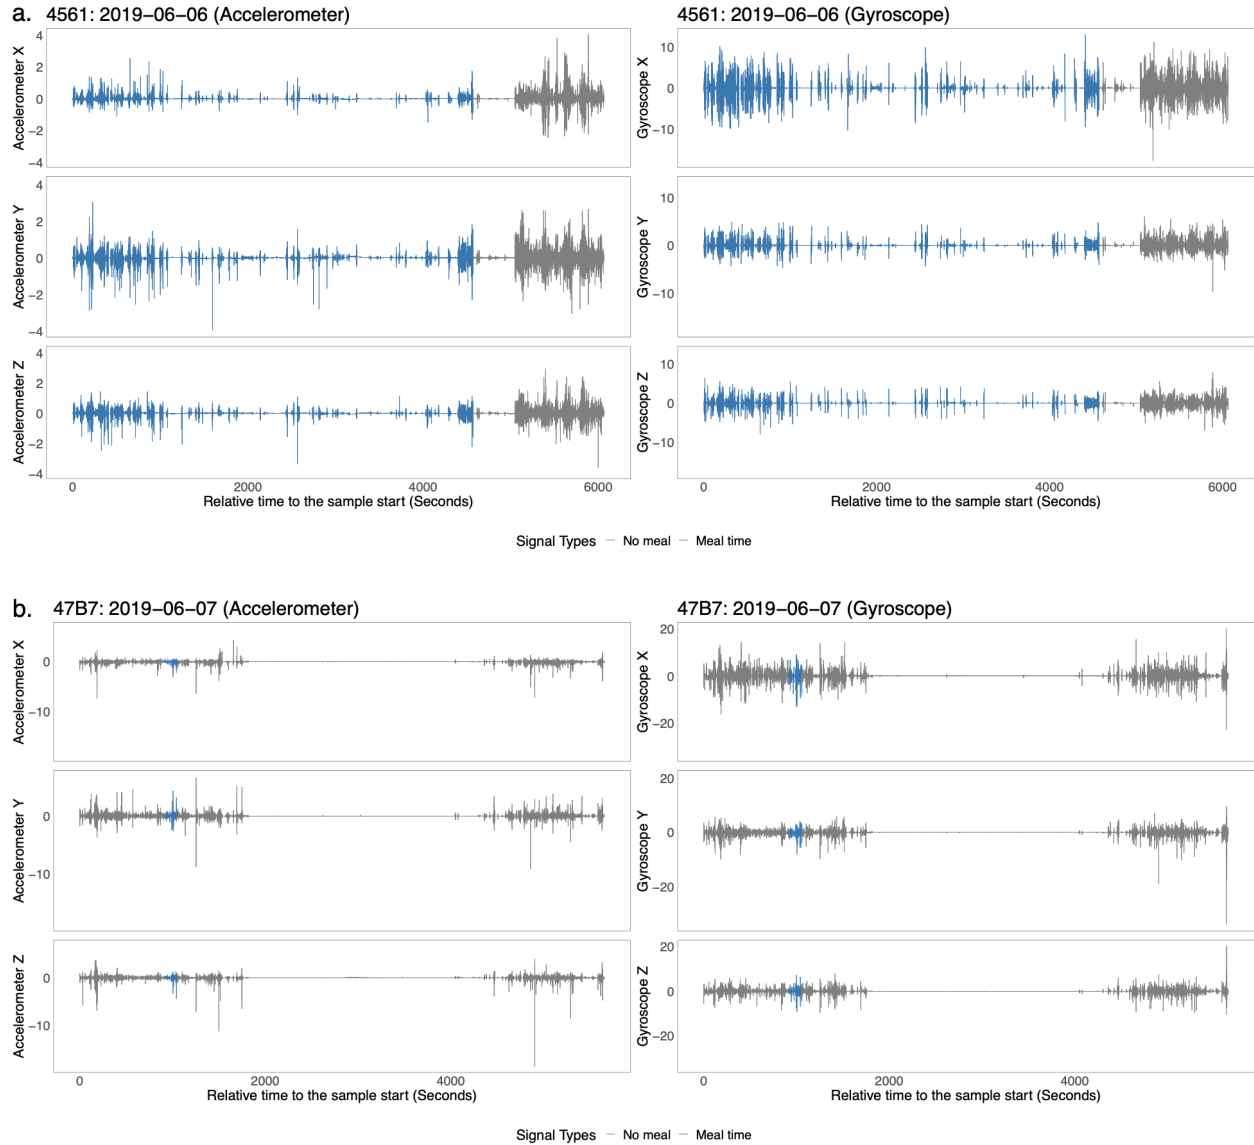

**Figure S3: AUPRC results of the experiments.** (a) is the experiment of data selection. (b) presents the experiments of choosing a normalization method based on the gyroscope model, and (c) shows the experiments of the augmentation methods based on the centering model.

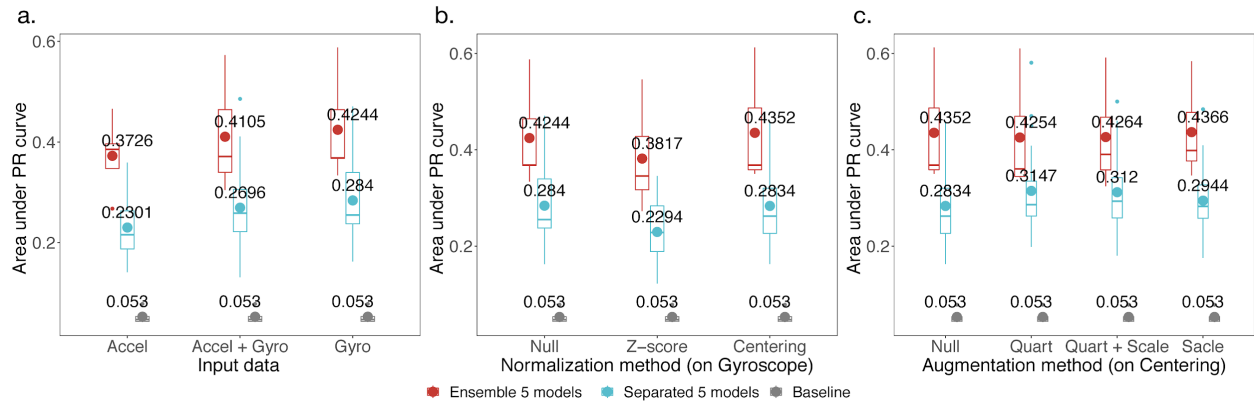

**Figure S4: The effects of the utensils on the model predictions and performances.** (a, b) show the correlations on the utensils, where (a) is the prediction scores and (b) is the AUCs computing by combining the meal records with randomly sampling negative records, whose size is three times larger. (c) is the average prediction scores (the red points and line) and the false positive rates (the blue bars) changing along with the meal times.

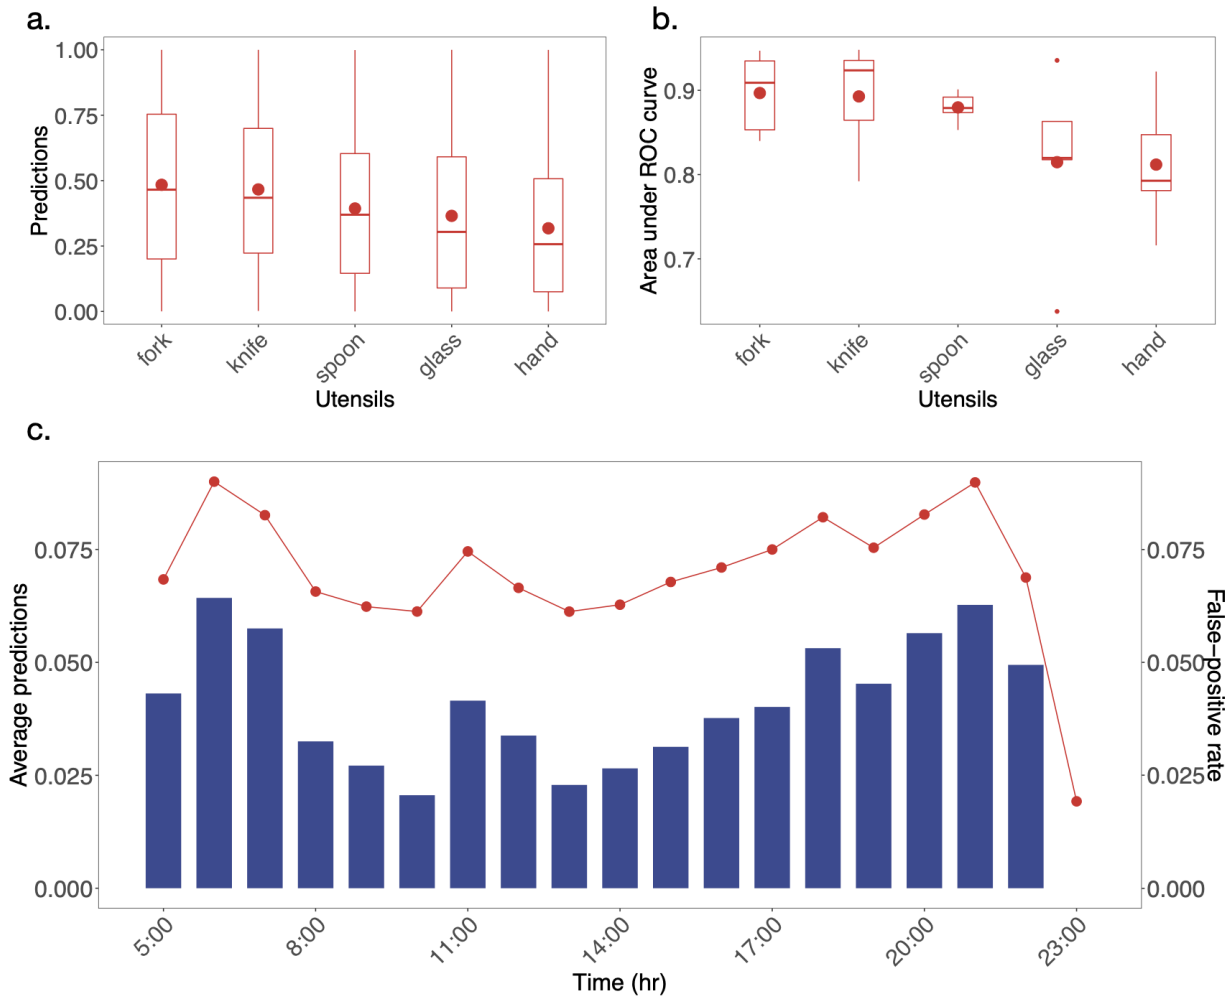

**Table S1. AUCs for the experiments on data selection**

| <b>Data</b>               | <b>Min.</b> | <b>Max.</b> | <b>Mean</b> | <b>Median</b> |
|---------------------------|-------------|-------------|-------------|---------------|
| Accelerometer             | 0.7201      | 0.8918      | 0.7977      | 0.7921        |
| Gyroscope                 | 0.7283      | 0.9250      | 0.8175      | 0.8170        |
| Gyroscope + local time    | 0.7150      | 0.9139      | 0.8114      | 0.8150        |
| Accelerometer + Gyroscope | 0.7082      | 0.9068      | 0.7977      | 0.8266        |

**Table S2. AUPRCs for the experiments on data selection**

| <b>Data</b>               | <b>Min.</b> | <b>Max.</b> | <b>Mean</b> | <b>Median</b> | <b>Baseline (mean)</b> |
|---------------------------|-------------|-------------|-------------|---------------|------------------------|
| Accelerometer             | 0.2676      | 0.4660      | 0.3725      | 0.3854        | 0.0530                 |
| Gyroscope                 | 0.3339      | 0.5879      | 0.4244      | 0.3685        | 0.0530                 |
| Gyroscope + local time    | 0.3350      | 0.5496      | 0.4008      | 0.3483        | 0.0530                 |
| Accelerometer + Gyroscope | 0.3047      | 0.5725      | 0.4105      | 0.3712        | 0.0530                 |

**Table S3. AUCs for the experiments on normalization method**

| <b>Normalization methods<br/>(On gyroscope model)</b> | <b>Min.</b> | <b>Max.</b> | <b>Mean</b> | <b>Median</b> |
|-------------------------------------------------------|-------------|-------------|-------------|---------------|
| Z-score                                               | 0.7611      | 0.9005      | 0.8072      | 0.7952        |
| Centering                                             | 0.7523      | 0.9208      | 0.8199      | 0.8221        |

**Table S4. AUPRCs for the experiments on normalization method**

| <b>Normalization methods<br/>(On gyroscope model)</b> | <b>Min.</b> | <b>Max.</b> | <b>Mean</b> | <b>Median</b> | <b>Baseline (mean)</b> |
|-------------------------------------------------------|-------------|-------------|-------------|---------------|------------------------|
| Z-score                                               | 0.2727      | 0.5459      | 0.3817      | 0.3456        | 0.0530                 |

|           |        |        |        |        |        |
|-----------|--------|--------|--------|--------|--------|
| Centering | 0.3502 | 0.6124 | 0.4352 | 0.3680 | 0.0530 |
|-----------|--------|--------|--------|--------|--------|

**Table S5. AUCs for the experiments on augmentations**

| <b>Augmentations<br/>(On centering model)</b> | <b>Min.</b> | <b>Max.</b> | <b>Mean</b> | <b>Median</b> |
|-----------------------------------------------|-------------|-------------|-------------|---------------|
| Quaternion rotation                           | 0.6992      | 0.9281      | 0.8159      | 0.8325        |
| Magnitude scaling                             | 0.7270      | 0.9278      | 0.8247      | 0.8294        |
| Quaternion rotation + Magnitude scaling       | 0.7431      | 0.9223      | 0.8230      | 0.8435        |

**Table S6. AUPRCs for the experiments on augmentations**

| <b>Augmentations<br/>(On centering model)</b> | <b>Min.</b> | <b>Max.</b> | <b>Mean</b> | <b>Median</b> | <b>Baseline<br/>(mean)</b> |
|-----------------------------------------------|-------------|-------------|-------------|---------------|----------------------------|
| Quaternion rotation                           | 0.3426      | 0.6103      | 0.4254      | 0.3602        | 0.0530                     |
| Magnitude scaling                             | 0.3467      | 0.5837      | 0.4366      | 0.3983        | 0.0530                     |
| Quaternion rotation + Magnitude scaling       | 0.3244      | 0.5912      | 0.4264      | 0.3904        | 0.0530                     |

**Table S7. AUCs and AUPRCs for each individual in the population models**

| <b>AUC</b>     |                       | <b>AUPRC</b>   |                       |                 |
|----------------|-----------------------|----------------|-----------------------|-----------------|
| <b>Patient</b> | <b>Ensemble model</b> | <b>Patient</b> | <b>Ensemble model</b> | <b>Baseline</b> |
| 02CE           | 0.94279               | 02CE           | 0.58668               | 0.03534         |
| 064F           | 0.89854               | 064F           | 0.43632               | 0.01557         |
| 08A5           | 0.93263               | 08A5           | 0.36747               | 0.00966         |
| 0D51           | 0.85046               | 0D51           | 0.35915               | 0.05315         |
| 0FA7           | 0.9397                | 0FA7           | 0.68408               | 0.04786         |
| 11FD           | 0.87925               | 11FD           | 0.51347               | 0.03341         |
| 16A9           | 0.80284               | 16A9           | 0.29021               | 0.02848         |

|               |         |               |         |         |
|---------------|---------|---------------|---------|---------|
| 1B55          | 0.7133  | 1B55          | 0.24996 | 0.06408 |
| 2257          | 0.6516  | 2257          | 0.14184 | 0.03935 |
| 2BAF          | 0.82917 | 2BAF          | 0.4235  | 0.06505 |
| 305B          | 0.74037 | 305B          | 0.33642 | 0.09673 |
| 32B1          | 0.87919 | 32B1          | 0.58658 | 0.03275 |
| 375D          | 0.68413 | 375D          | 0.3287  | 0.05651 |
| 3e5f          | 0.93554 | 3e5f          | 0.73509 | 0.05738 |
| 4561          | 0.7066  | 4561          | 0.32906 | 0.09972 |
| 47B7          | 0.70228 | 47B7          | 0.33399 | 0.09866 |
| <b>Mean</b>   | 0.81802 | <b>Mean</b>   | 0.41891 | 0.05211 |
| <b>Median</b> | 0.83982 | <b>Median</b> | 0.36331 | 0.05051 |

**Table S8. AUCs for each individual in fine-tuned models, compared to the original**

| <b>Before tuning</b> |                       | <b>After tuning</b> |                       |
|----------------------|-----------------------|---------------------|-----------------------|
| <b>Patient</b>       | <b>Ensemble model</b> | <b>Patient</b>      | <b>Ensemble model</b> |
| 02CE                 | 0.91557               | 02CE                | 0.94974               |
| 0D51                 | 0.81612               | 0D51                | 0.85828               |
| 0FA7                 | 0.93425               | 0FA7                | 0.96981               |
| 11FD                 | 0.90045               | 11FD                | 0.97437               |
| 16A9                 | 0.87588               | 16A9                | 0.93033               |
| 1B55                 | 0.72626               | 1B55                | 0.75031               |
| 2257                 | 0.51525               | 2257                | 0.92549               |
| 32B1                 | 0.9567                | 32B1                | 0.96611               |
| 2BAF                 | 0.88358               | 2BAF                | 0.75974               |
| 305B                 | 0.70921               | 305B                | 0.89419               |
| 4561                 | 0.68379               | 4561                | 0.68484               |
| 47B7                 | 0.78719               | 47B7                | 0.80158               |
| <b>Mean</b>          | 0.80869               | <b>Mean</b>         | 0.87207               |
| <b>Median</b>        | 0.84600               | <b>Median</b>       | 0.90984               |



**Table S9. AUPRCs for each individual in fine-tuned models, compared to the original**

| <b>Before tuning</b> |                        | <b>After tuning</b> |                        |                 |
|----------------------|------------------------|---------------------|------------------------|-----------------|
| <b>Patient</b>       | <b>ensemble (mean)</b> | <b>Patient</b>      | <b>ensemble (mean)</b> | <b>baseline</b> |
| 02CE                 | 0.58943                | 02CE                | 0.72932                | 0.03155         |
| 0D51                 | 0.24475                | 0D51                | 0.39015                | 0.04892         |
| 0FA7                 | 0.5848                 | 0FA7                | 0.70049                | 0.04772         |
| 11FD                 | 0.35281                | 11FD                | 0.57688                | 0.02037         |
| 16A9                 | 0.40664                | 16A9                | 0.68328                | 0.03265         |
| 1B55                 | 0.22112                | 1B55                | 0.19149                | 0.06719         |
| 2257                 | 0.07368                | 2257                | 0.68609                | 0.04005         |
| 32B1                 | 0.63705                | 32B1                | 0.79834                | 0.02046         |
| 2BAF                 | 0.36833                | 2BAF                | 0.37596                | 0.03865         |
| 305B                 | 0.37801                | 305B                | 0.61791                | 0.09417         |
| 4561                 | 0.43477                | 4561                | 0.49435                | 0.17555         |
| 47B7                 | 0.2792                 | 47B7                | 0.51653                | 0.08756         |
| <b>Mean</b>          | 0.38088                | <b>Mean</b>         | 0.56340                | 0.05874         |
| <b>Median</b>        | 0.37317                | <b>Median</b>       | 0.59740                | 0.04389         |

**Table S10. AUCs for aggregation on the entire meals**

| <b>Model</b>                      | <b>Mean</b> | <b>Median</b> |
|-----------------------------------|-------------|---------------|
| Data: Accelerometer               | 0.9103      | 0.9100        |
| Data: Gyroscope                   | 0.9478      | 0.9535        |
| Data: Accelerometer + Gyroscope   | 0.9215      | 0.9335        |
| Normalization: Z-score            | 0.9495      | 0.9459        |
| Normalization: Centering          | 0.9326      | 0.9280        |
| Augmentation: Quaternion rotation | 0.9370      | 0.9361        |
| Augmentation: Magnitude scaling   | 0.9506      | 0.9475        |

Augmentation: Quaternion rotation + 0.9350 0.9414  
Magnitude scaling

---

**Table S11. Accuracies for the aggregation on the 5- and 10-minute meals after meal start**

| <b>Evaluation Thresholds</b> | <b>Meal Length</b> | <b>Required Counts</b> | <b>Accuracy</b> |
|------------------------------|--------------------|------------------------|-----------------|
| 0.1                          | 5                  | 1                      | 0.9365          |
| 0.2                          | 5                  | 1                      | 0.8413          |
| 0.3                          | 5                  | 1                      | 0.7937          |
| 0.4                          | 5                  | 1                      | 0.7460          |
| 0.5                          | 5                  | 1                      | 0.6984          |
| 0.6                          | 5                  | 1                      | 0.6825          |
| 0.7                          | 5                  | 1                      | 0.5556          |
| 0.8                          | 5                  | 1                      | 0.4762          |
| 0.9                          | 5                  | 1                      | 0.3492          |
| 0.1                          | 5                  | 3                      | 0.8730          |
| 0.2                          | 5                  | 3                      | 0.7460          |
| 0.3                          | 5                  | 3                      | 0.7143          |
| 0.4                          | 5                  | 3                      | 0.6825          |
| 0.5                          | 5                  | 3                      | 0.6190          |
| 0.6                          | 5                  | 3                      | 0.5079          |
| 0.7                          | 5                  | 3                      | 0.4444          |
| 0.8                          | 5                  | 3                      | 0.2857          |
| 0.9                          | 5                  | 3                      | 0.2063          |
| 0.1                          | 10                 | 1                      | 0.9841          |
| 0.2                          | 10                 | 1                      | 0.9206          |
| 0.3                          | 10                 | 1                      | 0.9206          |
| 0.4                          | 10                 | 1                      | 0.8730          |
| 0.5                          | 10                 | 1                      | 0.8254          |
| 0.6                          | 10                 | 1                      | 0.7937          |
| 0.7                          | 10                 | 1                      | 0.7143          |
| 0.8                          | 10                 | 1                      | 0.5873          |
| 0.9                          | 10                 | 1                      | 0.5079          |
| 0.1                          | 10                 | 3                      | 0.9683          |

|     |    |   |        |
|-----|----|---|--------|
| 0.2 | 10 | 3 | 0.9048 |
| 0.3 | 10 | 3 | 0.8889 |
| 0.4 | 10 | 3 | 0.7937 |
| 0.5 | 10 | 3 | 0.7302 |
| 0.6 | 10 | 3 | 0.6508 |
| 0.7 | 10 | 3 | 0.5556 |
| 0.8 | 10 | 3 | 0.4444 |
| 0.9 | 10 | 3 | 0.3175 |

---

**Table S12. False-positive alarms per hour for the aggregation on the all negative regions**

| <b>Evaluation Thresholds</b> | <b>Required Counts</b> | <b>False Positive Alarm Per Hour</b> |
|------------------------------|------------------------|--------------------------------------|
| 0.1                          | 1                      | 1.7303                               |
| 0.2                          | 1                      | 0.8622                               |
| 0.3                          | 1                      | 0.3507                               |
| 0.4                          | 1                      | 0.1783                               |
| 0.5                          | 1                      | 0.1140                               |
| 0.6                          | 1                      | 0.0555                               |
| 0.7                          | 1                      | 0.0292                               |
| 0.8                          | 1                      | 0.0146                               |
| 0.9                          | 1                      | 0.0088                               |
| 0.1                          | 3                      | 0.8739                               |
| 0.2                          | 3                      | 0.3887                               |
| 0.3                          | 3                      | 0.1724                               |
| 0.4                          | 3                      | 0.0965                               |
| 0.5                          | 3                      | 0.0438                               |
| 0.6                          | 3                      | 0.0205                               |
| 0.7                          | 3                      | 0.0146                               |
| 0.8                          | 3                      | 0.0117                               |
| 0.9                          | 3                      | 0.0058                               |

**Table S13. Network structures**

| Layer     | Type                | # of filters | Kernel size | Stride | Padding | Activation | Output size*     |
|-----------|---------------------|--------------|-------------|--------|---------|------------|------------------|
| input_1   | Input               | /            | /           | /      | /       | /          | (None, 15000, 3) |
| Conv1d_1  | Convolution         | 8            | 11          | 1      | Valid   | ReLU       | (None, 14990, 8) |
| BN_1      | Batch Normalization | /            | /           | /      | /       | /          | (None, 14990, 8) |
| MaxPool_1 | Max Pooling         | /            | 2           | 2      | Valid   | /          | (None, 7495, 8)  |
| Conv1d_2  | Convolution         | 16           | 10          | 1      | Valid   | ReLU       | (None, 7486, 16) |
| BN_2      | Batch Normalization | /            | /           | /      | /       | /          | (None, 7486, 16) |
| MaxPool_2 | Max Pooling         | /            | 2           | 2      | Valid   | /          | (None, 3743, 16) |
| Conv1d_3  | Convolution         | 16           | 10          | 1      | Valid   | ReLU       | (None, 3734, 16) |
| BN_3      | Batch Normalization | /            | /           | /      | /       | /          | (None, 3734, 16) |
| MaxPool_3 | Max Pooling         | /            | 2           | 2      | Valid   | /          | (None, 1867, 16) |
| Conv1d_4  | Convolution         | 32           | 8           | 1      | Valid   | ReLU       | (None, 1860, 32) |
| BN_4      | Batch Normalization | /            | /           | /      | /       | /          | (None, 1860, 32) |
| MaxPool_4 | Max Pooling         | /            | 2           | 2      | Valid   | /          | (None, 930, 32)  |
| Conv1d_5  | Convolution         | 32           | 9           | 1      | Valid   | ReLU       | (None, 922, 32)  |
| BN_5      | Batch Normalization | /            | /           | /      | /       | /          | (None, 922, 32)  |
| MaxPool_5 | Max Pooling         | /            | 2           | 2      | Valid   | /          | (None, 461, 32)  |
| Conv1d_6  | Convolution         | 64           | 6           | 1      | Valid   | ReLU       | (None, 456, 64)  |
| BN_6      | Batch Normalization | /            | /           | /      | /       | /          | (None, 456, 64)  |
| MaxPool_6 | Max Pooling         | /            | 2           | 2      | Valid   | /          | (None, 228, 64)  |

|            |                     |     |   |   |       |         |                  |
|------------|---------------------|-----|---|---|-------|---------|------------------|
| Conv1d_7   | Convolution         | 64  | 7 | 1 | Valid | ReLU    | (None, 222, 64)  |
| BN_7       | Batch Normalization | /   | / | / | /     | /       | (None, 222, 64)  |
| MaxPool_7  | Max Pooling         | /   | 2 | 2 | Valid | /       | (None, 111, 64)  |
| Conv1d_8   | Convolution         | 128 | 4 | 1 | Valid | ReLU    | (None, 108, 128) |
| BN_8       | Batch Normalization | /   | / | / | /     | /       | (None, 108, 128) |
| MaxPool_8  | Max Pooling         | /   | 2 | 2 | Valid | /       | (None, 54, 128)  |
| Conv1d_9   | Convolution         | 128 | 5 | 1 | Valid | ReLU    | (None, 50, 128)  |
| BN_9       | Batch Normalization | /   | / | / | /     | /       | (None, 50, 128)  |
| MaxPool_9  | Max Pooling         | /   | 2 | 2 | Valid | /       | (None, 25, 128)  |
| Conv1d_10  | Convolution         | 256 | 2 | 1 | Valid | ReLU    | (None, 24, 256)  |
| BN_10      | Batch Normalization | /   | / | / | /     | /       | (None, 24, 256)  |
| MaxPool_10 | Max Pooling         | /   | 2 | 2 | Valid | /       | (None, 12, 256)  |
| flatten_1  | Flatten             | /   | / | / | /     | /       | (None, 3072)     |
| dense_1    | Dense               | /   | / | / | /     | Sigmoid | (None, 1)        |

\*The positions of “None” are for the batch size

**Table S14. DeepConvLSTM structures**

| Layer     | Type                   | # of filters | Kernel size | Stride | Activation | Output size*          |
|-----------|------------------------|--------------|-------------|--------|------------|-----------------------|
| input_1   | Input                  | /            | /           | /      | /          | (None, 20, 15000, 3)  |
| Conv1d_1  | Convolution            | 32           | (1, 5)      | 1      | ReLU       | (None, 20, 14996, 32) |
| BN_1      | Batch Normalization    | /            | /           | /      | /          | (None, 20, 14996, 32) |
| MaxPool_1 | Max Pooling            | /            | (1, 2)      | (1, 2) | /          | (None, 20, 7498, 32)  |
| Conv1d_2  | Convolution            | 32           | (1, 5)      | 1      | ReLU       | (None, 20, 7494, 32)  |
| BN_2      | Batch Normalization    | /            | /           | /      | /          | (None, 20, 7494, 32)  |
| MaxPool_2 | Max Pooling            | /            | (1, 2)      | (1, 2) | /          | (None, 20, 3747, 32)  |
| Conv1d_3  | Convolution            | 32           | (1, 5)      | 1      | ReLU       | (None, 20, 3743, 32)  |
| BN_3      | Batch Normalization    | /            | /           | /      | /          | (None, 20, 3743, 32)  |
| MaxPool_3 | Max Pooling            | /            | (1, 2)      | (1, 2) | /          | (None, 20, 1871, 32)  |
| Conv1d_4  | Convolution            | 32           | (1, 5)      | 1      | ReLU       | (None, 20, 1867, 32)  |
| BN_4      | Batch Normalization    | /            | /           | /      | /          | (None, 20, 1867, 32)  |
| MaxPool_4 | Max Pooling            | /            | (1, 2)      | (1, 2) | /          | (None, 20, 933, 32)   |
| reshape_1 | Reshape                | /            | /           | /      | /          | (None, 20, 29856)     |
| lstm_1    | LSTM**                 | /            | /           | /      | Tanh       | (None, 20, 64)        |
| lstm_2    | LSTM**                 | /            | /           | /      | Tanh       | (None, 20, 64)        |
| dense_1   | Time distributed dense | /            | /           | /      | Sigmoid    | (None, 20, 1)         |
| reshape_2 | Reshape                | /            | /           | /      | /          | (None, 20)            |

\*The positions of “None” are for the batch size

\*\*Use dropout = 0.5



**Table S15. Examples of other types of instruments in studying digital biomarkers for eating behavior.**

| Study                | Definitions of eating                                                                     | Device position                                                                                                    | Number of participants                                    | Total hours                                                                                                                                                                                                                  | Weighted accuracy                                                          |
|----------------------|-------------------------------------------------------------------------------------------|--------------------------------------------------------------------------------------------------------------------|-----------------------------------------------------------|------------------------------------------------------------------------------------------------------------------------------------------------------------------------------------------------------------------------------|----------------------------------------------------------------------------|
| Nishimura et al [28] | Eating habits monitoring using wireless, wearable in-ear microphone                       | Ear                                                                                                                | N/A <sup>a</sup>                                          | <ul style="list-style-type: none"> <li>• 100 chews for each food sample: potato chips, rice, banana, salad, wafers, apples, peanuts, jelly, rice crackers.</li> <li>• Data were approximately 1 minute in length.</li> </ul> | Average error rate 1.93%                                                   |
| Ravi et al [29]      | Real-time food intake classification and energy expenditure estimation on a mobile device | Image-based classification                                                                                         | 5                                                         | <ul style="list-style-type: none"> <li>• The data set UEC-FOOD100 contained 100 food categories with &gt;100 images per category.</li> <li>• The total number of food images in the data set was 12,905.</li> </ul>          | Up to 0.78 accuracy                                                        |
| Liu et al [30]       | An intelligent food intake monitoring system using wearable sensors                       | Ear microphone and camera                                                                                          | 6                                                         | <ul style="list-style-type: none"> <li>• Lunch up to 30 minutes</li> </ul>                                                                                                                                                   | Eating recognition rate 82.51%                                             |
| Mirtchouk et al [5]  | Recognizing eating from body-worn sensors: combining free-living and laboratory data      | Google Glass for head motion, smartwatches on each wrist for wrist motion, and an earbud to capture chewing sounds | 6 in laboratory study and 6 new to test; generalizability | <ul style="list-style-type: none"> <li>• Laboratory: 72 hours</li> <li>• Free-living: 180 hours</li> </ul>                                                                                                                   | Leave one free-living session out: precision 31%; recall 87%; accuracy 85% |

|                     |                                                                                                          |                          |    |                                                               |                                                                     |
|---------------------|----------------------------------------------------------------------------------------------------------|--------------------------|----|---------------------------------------------------------------|---------------------------------------------------------------------|
| Gao et al [31]      | iHearFood: eating detection using commodity Bluetooth headsets                                           | Bluetooth headsets       | 28 | <ul style="list-style-type: none"> <li>● 20 hours</li> </ul>  | Leave one sample out 94.72%;<br>leave one person out 76.82%         |
| Blechert et al [32] | Unobtrusive electromyography-based eating detection in daily life: a new tool to address underreporting? | Electromyography sensors | 15 | <ul style="list-style-type: none"> <li>● 360 hours</li> </ul> | Sensitivity mean 87.3 (SD 21.7) and specificity mean 86.9 (SD 16.8) |

<sup>a</sup>N/A: not available.
